# Supplementary material for: Autocrine VEGF signaling promotes cell proliferation through a PLC-dependent pathway and modulates Apatinib treatment efficacy in gastric cancer
Source: PubMed Central journal article supplement (PMC5355320; doi:10.18632/oncotarget.14467), 2017-01-03
Supplement: oncotarget-08-11990-s001.pdf [file oncotarget-08-11990-s001.pdf]

## Autocrine VEGF signaling promotes cell proliferation through a PLC-dependent pathway and modulates Apatinib treatment efficacy in gastric cancer

### SUPPLEMENTARY TABLES

**Supplementary Table 1: Reagent for study**

| <b>Reagent</b>                      | <b>Manufacturer</b>                      |
|-------------------------------------|------------------------------------------|
| Recombinant VEGF                    | R&D Systems, Minneapolis, MN             |
| Apatinib                            | HengRui Medicine Co. LTD, Jiangsu, China |
| VEGF Receptor 1 neutralize antibody | R&D Systems, Minneapolis, MN.            |
| VEGF Receptor 2 neutralize antibody | R&D Systems, Minneapolis, MN.            |
| SU1498                              | Abcam plc, UK                            |
| U73122                              | Sellock, Shanghai, China                 |

**Supplementary Table 2: Antibody for immunoblot**

| <b>Antibody</b>        | <b>Source information(cat#, vendor)</b> | <b>Dosage</b>       | <b>Usage</b> |
|------------------------|-----------------------------------------|---------------------|--------------|
| VEGF                   | Ab1316, Abcam                           | 1:1000 dilution     | WB           |
| VEGFR1                 | #2893, Cell Signaling                   | 1:1000              | WB           |
| pVEGFR1                | Ab62183, Abcam                          | 1:1000              | WB           |
| VEGFR2                 | #2479, Cell Signaling                   | 1:150 IF, 1:1000 WB | IF, WB       |
| pVEGFR2 (pY1054-Y1059) | Ab5473, Abcam                           | 1:100 IF, 1:1000 WB | IF, WB       |
| PLC- $\gamma$ 1        | #2822, Cell Signaling                   | 1:1000              | WB           |
| pPLC- $\gamma$ 1       | #2821, Cell Signaling                   | 1:1000              | WB           |
| Erk1/2                 | #9102, Cell Signaling                   | 1:1000              | WB           |
| pErk1/2                | #9101, Cell Signaling                   | 1:1000              | WB           |
| GAPDH                  | #97166, Cell Signaling                  | 1:1000              | WB           |
| Tubulin                | #2148, Cell Signaling                   | 1:1000              | WB           |
| Histone H3             | #4499, Cell Signaling                   | 1:1000              | WB           |
| Ki67                   | #12202, Cell Signaling                  | 1:400               | IHC          |
| CD31                   | #77699, Cell Signaling                  | 1:100               | IHC          |

Supplementary Table 3: Oligonucleotide primers

| Primer    | Sequence(5' to 3')          | Location  | Use           |
|-----------|-----------------------------|-----------|---------------|
| VEGF-5'   | ATCTTCAAGCCATCCTGTGTGC      | sense     | Real-time PCR |
| VEGF-3'   | CAAGGCCACAGGGATTTTC         | antisense | Real-time PCR |
| VEGFR1-5' | ATC ATT CCG AAG CAA GGT GTG | sense     | Real-time PCR |
| VEGFR1-3' | AAA CCC ATT TGG CAC ATC TGT | antisense | Real-time PCR |
| VEGFR2-5' | AGGCAGCTCACAGTCCTAGAGC      | sense     | Real-time PCR |
| VEGFR2-3' | GTCTTTTCCTGGGCACCTTCTA      | antisense | Real-time PCR |
| GAPDH-5'  | TGCACCACCAACTGCTTAGC        | sense     | Real-time PCR |
| GAPDH-3'  | GGCATGGACTGTGGTCATGAG       | antisense | Real-time PCR |
